# Supplementary material for: The synthesis of novel Co–Al2O3 nanofibrous membranes with efficient activation of peroxymonosulfate for bisphenol A degradation
Source: Royal Society of Chemistry journal article supplement (doi:10.1039/c8en00366a), 2018-01-01
Supplement: c8en00366a2.pdf [file c8en00366a2.pdf]

Electronic Supplementary Information for

## **The synthesis of novel Co-Al<sub>2</sub>O<sub>3</sub> nanofibrous membranes with efficient activation of peroxymonosulfate for bisphenol A degradation**

Yan Wang<sup>a</sup>, Shuang Zhao<sup>a</sup>, Wencheng Fan<sup>b</sup>, Yang Tian<sup>b</sup>, Xu Zhao<sup>\*a,c</sup>

a, Key Laboratory of Drinking Water Science and Technology, Research Center for Eco-Environmental Sciences, Chinese Academy of Sciences, Beijing 100085, P.R. China.

b, Department of Chemistry, Capital Normal University, Haidian District, Beijing 100048, China

c, University of Chinese Academy of Sciences, Beijing, P.R. China.

### **Text S1**

During the degradation process, the solution pH was real time monitored by a pH meter, and NaHCO<sub>3</sub> was dropwise added to the solution to maintain the solution pH at 7. Carbonate buffer was usually used in PMS activation process for organic pollutant degradation.<sup>1-3</sup> The NaHCO<sub>3</sub> was 3 mM when the solution pH was maintained at 7 during reactions.

Herein, the effect of NaHCO<sub>3</sub> concentration on BPA degradation was studied. As shown in Fig. S2, 88%, 100%, 94%, 83% and 80% BPA were removed within 60 min when 0, 3, 5, 7, and 10 mM NaHCO<sub>3</sub> were added, respectively. It can be seen that the degradation rate increased when using 3 mM NaHCO<sub>3</sub> buffer compared to that without buffer, but decreased when the concentration of NaHCO<sub>3</sub> buffer increased from 3 mM to 10 mM, and inhibited at high NaHCO<sub>3</sub> buffer concentrations (higher than 7 mM). Fig. S2B present the corresponding pH during reactions, which was at pH3 when without NaHCO<sub>3</sub> and were generally neutral (pH7-8) with NaHCO<sub>3</sub> (3-10 mM). The reason for the effect of NaHCO<sub>3</sub> on BPA degradation was analyzed as

follows:

On one hand, it is reported that low pH has negative effect on the degradation due to the scavenge of  $\cdot\text{OH}$  and  $\text{SO}_4^{\cdot-}$  by excess  $\text{H}^+$  (Eqs. (S1)-(S2)).<sup>4-6</sup> Commonly, oxone ( $2\text{KHSO}_5\cdot\text{KHSO}_4\cdot\text{K}_2\text{SO}_4$ ) was used as PMS, which was acidity.<sup>2,3</sup> As shown in Fig. S2B, with the addition of PMS, the pH sharply decreased to 3.2 when without buffer, while slightly decreased and kept at  $\sim 7.0$  when with 3 mM  $\text{NaHCO}_3$  buffer. Obviously, the buffer could alleviate the acidification that caused by PMS addition. Therefore, the BPA degradation rate increased when with 3 mM  $\text{NaHCO}_3$  buffer compared to that without buffer.

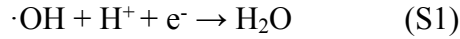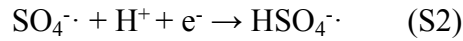

On the other hand,  $\text{HCO}_3^-$  can react with  $\cdot\text{OH}$  or  $\text{SO}_4^{\cdot-}$  to generate  $\text{CO}_3^{\cdot-}$  free radicals at high rate (Eq. (S3)-(S4)).<sup>6-8</sup> It is reported that the steady-state concentration of  $\text{CO}_3^{\cdot-}$  is 600-fold higher than  $\text{SO}_4^{\cdot-}$  in the UV/persulfate system.<sup>7</sup> Thus the role of  $\text{CO}_3^{\cdot-}$  should be taken into consideration in the degradation process. The oxidization potential ( $E^0$ ) and reaction rate constants between BPA and various free radicals were listed in Table S1.<sup>7,9</sup> It can be seen that  $E^0(\text{SO}_4^{\cdot-}) > E^0(\text{HO}\cdot) > E^0(\text{CO}_3^{\cdot-}/\text{HCO}_3\cdot)$ , which indicates that  $\text{CO}_3^{\cdot-}$  process a weaker oxidation ability than  $\text{SO}_4^{\cdot-}$  and  $\text{HO}\cdot$ . The reaction rate constants of both  $k_{\text{SO}_4^{\cdot-}\cdot\text{BPA}}$  and  $k_{\text{HO}\cdot\text{BPA}}$  were 3-4 orders of magnitude higher than  $k_{\text{CO}_3^{\cdot-}/\text{HCO}_3\cdot\text{BPA}}$ . Hence, excess amount of  $\text{HCO}_3^-$  usually exhibits inhibition effect on BPA degradation in  $\cdot\text{OH}$  or  $\text{SO}_4^{\cdot-}$  based advanced oxidation processes.<sup>6,8,10-</sup>

14

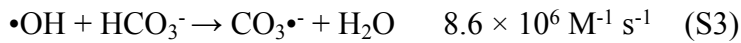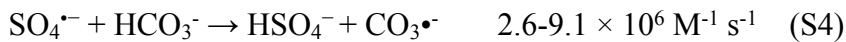

Moreover, because the reaction rate constants of both  $k_{\text{SO}_4^{\cdot-}\cdot\text{BPA}}$  and  $k_{\text{HO}\cdot\text{BPA}}$  were 3-4 orders of magnitude higher than  $k_{\text{SO}_4^{\cdot-}\cdot\text{HCO}_3^-}$  and  $k_{\text{HO}\cdot\text{HCO}_3^-}$  (Table S1 and Eq. (S3)-(S4)), the concentration of  $\text{CO}_3^{\cdot-}$  may be not as high as 600-fold higher than  $\text{SO}_4^{\cdot-}$  and  $\cdot\text{OH}$  when at low  $\text{HCO}_3^-$  concentration in this reaction. Therefore, the contribution of  $\text{CO}_3^{\cdot-}$  to the degradation of BPA is small when using 3 mM  $\text{NaHCO}_3$ .

In short, the positive effect of  $\text{NaHCO}_3$  at low concentration was due to its buffer function, while the negative effect of  $\text{NaHCO}_3$  at high concentration was due to its scavenge of  $\cdot\text{OH}$  and  $\text{SO}_4^{\cdot-}$  by  $\text{HCO}_3^-$ . The results are in accordance with many previous reports.<sup>6,14</sup>

## Text S2

The possible byproducts formed from BPA degradation were identified by LCMS. To ensure the veracity, two samples including the solution of 100% BPA removed (initial conc.  $20 \text{ mg L}^{-1}$ , denoted as Sample A), and the solution of 59% BPA removed (initial conc.  $100 \text{ mg L}^{-1}$ , denoted as Sample B) were tested. As shown in Fig. S8, only a few peaks were observed in Sample A, while more peaks were observed in Sample B. In the mass spectra (Fig. S8(b-e)), the products at  $m/z$  227, 243, 221, 135, 75 were detected, and they correspond to BPA itself and its byproducts formulated as P1, P2, P3, P4, respectively. As shown in Table S5, only P1 and P3 were detected in Sample A, while BPA itself and P1 to P4 were detected in Sample B. Because the initial concentration of Sample B was high, and BPA was only partially degraded in Sample B, thus BPA itself and some intermediates as well as some small  $m/z$  byproducts were detected in Sample B.

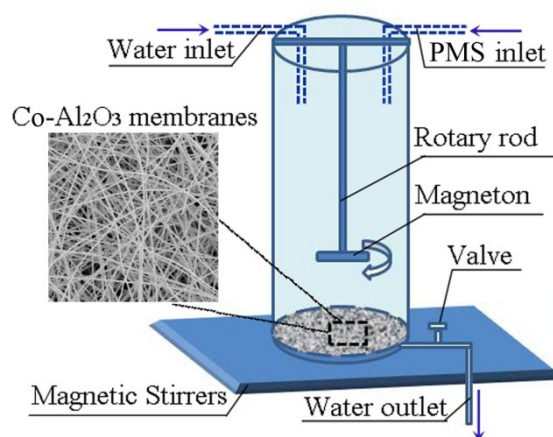

**Fig. S1** The membrane reactor that used in the degradation process.

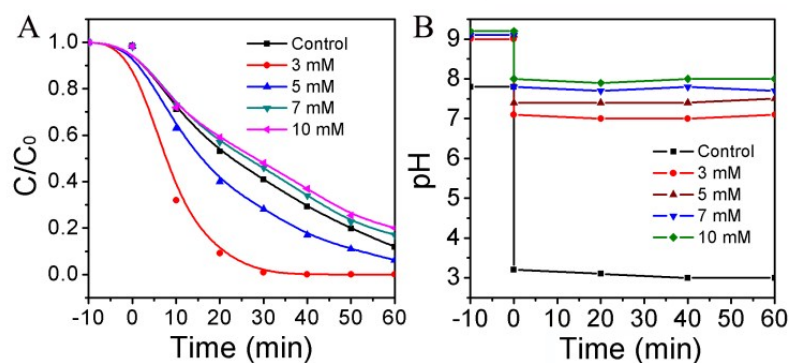

**Fig. S2** (A) Effect of  $\text{NaHCO}_3$  concentration on BPA degradation by 11%  $\text{Co-Al}_2\text{O}_3$ -600 °C membrane, and (B) the corresponding pH during reactions. Conditions:  $[\text{BPA}] = 20 \text{ mg L}^{-1}$ ,  $[\text{PMS}] = 1 \text{ mM}$ .

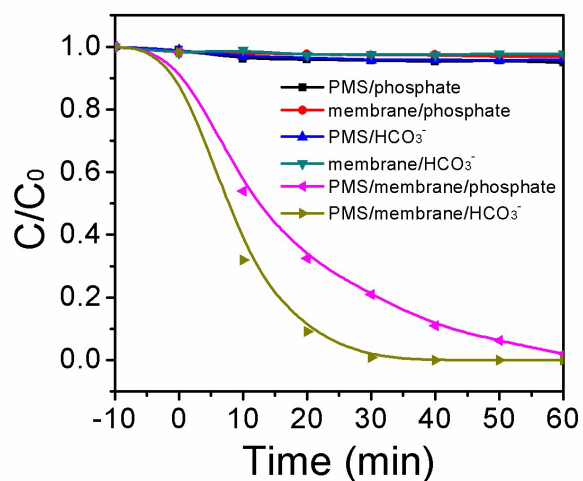

**Fig. S3** The comparison of different system on BPA degradation by 11%  $\text{Co-Al}_2\text{O}_3$ -600 °C membrane. Conditions:  $[\text{BPA}] = 20 \text{ mg L}^{-1}$ ,  $[\text{PMS}] = 1 \text{ mM}$ , the pH was adjusted by phosphates at pH7 when  $\text{HCO}_3^-$  is not added.

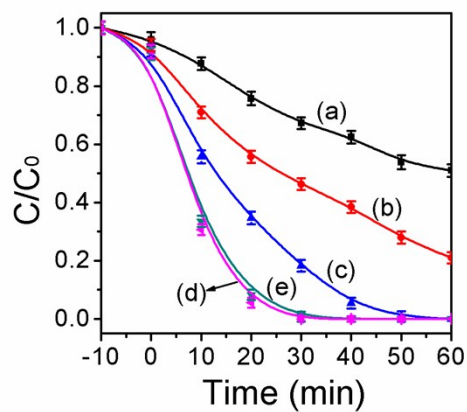

**Fig. S4** Effect of membrane dosage on BPA degradation by 11% Co-Al<sub>2</sub>O<sub>3</sub>-600 °C membrane. (a) 0.12 g L<sup>-1</sup>, (b) 0.25 g L<sup>-1</sup>, (c) 0.5 g L<sup>-1</sup>, (d) 1.0 g L<sup>-1</sup>, (e) 1.25 g L<sup>-1</sup>. Conditions: [BPA] = 20 mg L<sup>-1</sup>, [PMS] = 1 mM.

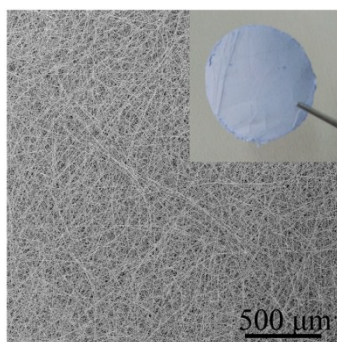

**Fig. S5** A SEM image and optical image (the insert) of the membrane after use.

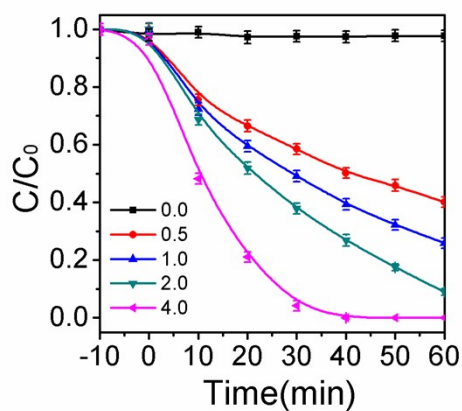

**Fig. S6** Effect of PMS dosage on BPA degradation by 5.5% Co-Al<sub>2</sub>O<sub>3</sub>-600 °C membrane. Conditions: [BPA] = 20 mg L<sup>-1</sup>.

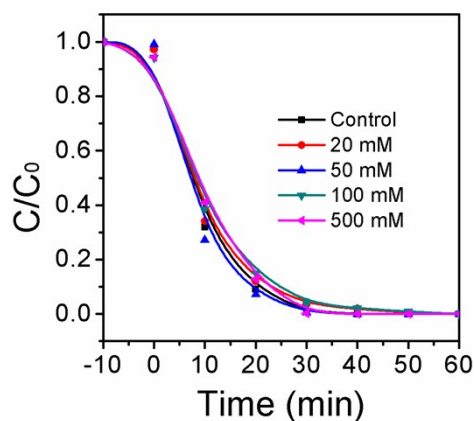

**Fig. S7** Effect of ion strength ( $\text{NaClO}_4$ ) on BPA degradation by 11%  $\text{Co-Al}_2\text{O}_3$ -600 °C membrane. Conditions:  $[\text{BPA}] = 20 \text{ mg L}^{-1}$ ,  $[\text{PMS}] = 1 \text{ mM}$ .

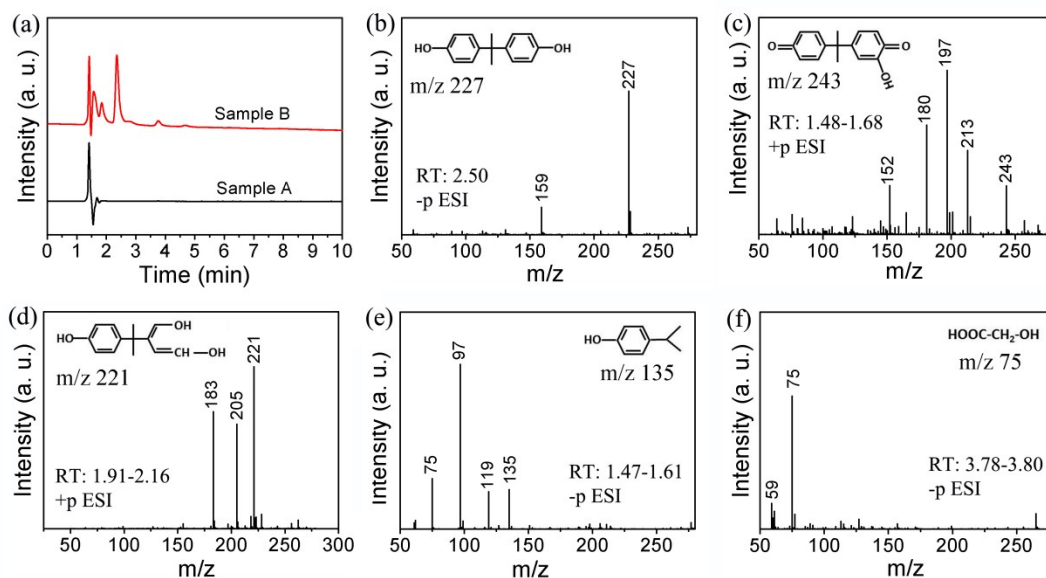

**Fig. S8.** (a) Chromatogram of the samples, and (b-e) Mass spectra and proposed structures of BPA and byproducts. Note: Sample A corresponds to the solution of 100% BPA removed (initial conc.  $20 \text{ mg L}^{-1}$ ); Sample B corresponds to the solution of 59% BPA removed (initial conc.  $100 \text{ mg L}^{-1}$ ).

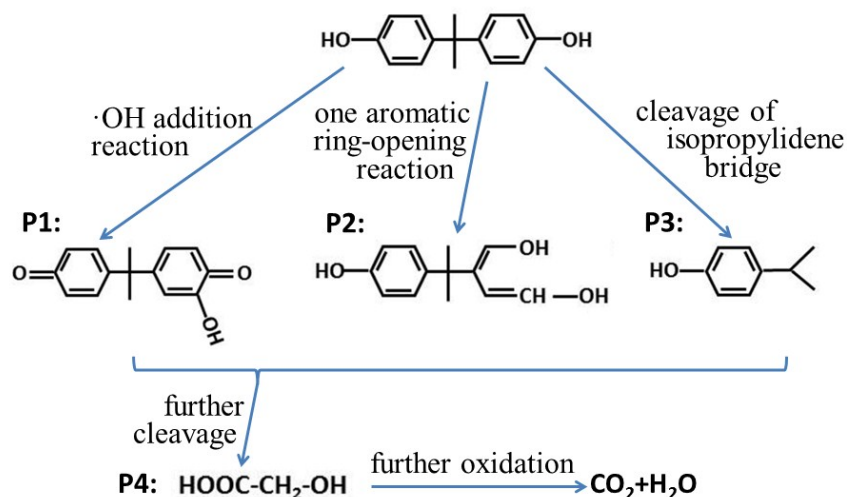

**Fig. S9** The degradation pathway for BPA in this reaction.

**Table S1** The property and relative constants of various free radicals

| Free radicals                          | $E^0$     | $k$ (between the radicals and BPA)                           |
|----------------------------------------|-----------|--------------------------------------------------------------|
| $\text{HO}\cdot$                       | 1.9-2.7 V | $1.70 \pm 0.21 \times 10^{10} \text{ M}^{-1} \text{ s}^{-1}$ |
| $\text{SO}_4\cdot^-$                   | 2.5-3.1 V | $1.37 \pm 0.15 \times 10^9 \text{ M}^{-1} \text{ s}^{-1}$    |
| $\text{CO}_3\cdot^-/\text{HCO}_3\cdot$ | 1.78 V    | $3.89 \pm 0.09 \times 10^6 \text{ M}^{-1} \text{ s}^{-1}$    |

**Table S2** Properties of final solutions for the samples with various initial pH.

| Initial pH | Final pH | Co leaching<br>( $\text{mg L}^{-1}$ ) | Al leaching<br>( $\text{mg L}^{-1}$ ) |
|------------|----------|---------------------------------------|---------------------------------------|
| 3.0        | 2.5      | 0.12                                  | 0.66                                  |
| 5.0        | 2.7      | 0.13                                  | 0.60                                  |
| 7.0        | 6.7      | 0.10                                  | 0.19                                  |
| 9.0        | 7.2      | 0.11                                  | 0.20                                  |
| 11.0       | 10.1     | 0.13                                  | 0.27                                  |

**Table S3** Properties of final solutions for various membranes

| membrane                                       | Final pH | Co leaching<br>(mg L <sup>-1</sup> ) | Al leaching<br>(mg L <sup>-1</sup> ) |
|------------------------------------------------|----------|--------------------------------------|--------------------------------------|
| 1.1%-Co-Al <sub>2</sub> O <sub>3</sub> -600 °C | 7.1      | 0.06                                 | 0.18                                 |
| 5.5%-Co-Al <sub>2</sub> O <sub>3</sub> -600 °C | 7.0      | 0.09                                 | 0.20                                 |
| 11%-Co-Al <sub>2</sub> O <sub>3</sub> -600 °C  | 7.1      | 0.13                                 | 0.17                                 |
| 5.5%-Co-Al <sub>2</sub> O <sub>3</sub> -700 °C | 7.0      | 0.10                                 | 0.11                                 |
| 5.5%-Co-Al <sub>2</sub> O <sub>3</sub> -800 °C | 7.2      | 0.11                                 | 0.00                                 |

**Table S4** Results of BPA degradation by activation of PMS via various catalysts

| Catalysts                                                           | morphology    | BPA initial conc. (ppm) | PMS initial concentration (mM) | Removal ability | Ref.      |
|---------------------------------------------------------------------|---------------|-------------------------|--------------------------------|-----------------|-----------|
| CuFe <sub>2</sub> O <sub>4</sub>                                    | nanoparticles | 50                      | 1.00                           | 95.2% in 60 min | [15]      |
| Mn <sub>1.8</sub> Fe <sub>1.2</sub> O <sub>4</sub>                  | Nanospheres   | 10                      | 0.65                           | 95% in 30 min   | [16]      |
| CoMnAl mixed metal oxides                                           | powders       | 10                      | 0.50                           | 100% in 90 min  | [17]      |
| sulfur-doped carbon nitride with visible light irradiation          | powders       | 50                      | 1.00                           | 50% in 120 min  | [18]      |
| Ag/mpg-C <sub>3</sub> N <sub>4</sub> with visible light irradiation | powders       | 20                      | 1.00                           | 100% in 60 min  | [19]      |
| 11% Co-Al <sub>2</sub> O <sub>3</sub> -600 °C                       | membranes     | 20                      | 1.00                           | 100% in 40 min  | This work |

**Reaction conditions:** Initial pH 7, at 20-30 °C.

**Table S5** Possible byproducts identified by LCMS.

| Products | Structure                                                                         | m/z | Sample A     | Sample B |
|----------|-----------------------------------------------------------------------------------|-----|--------------|----------|
| BPA      | 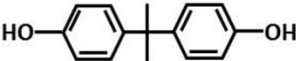 | 227 | not detected | detected |
| P1       |  | 243 | detected     | detected |
| P2       |  | 221 | not detected | detected |
| P3       |  | 135 | detected     | detected |
| P4       | HOOC-CH <sub>2</sub> -OH                                                          | 75  | not detected | detected |

**Note:** Sample A corresponds to the solution of 100% BPA removed (initial conc. 20 mg L<sup>-1</sup>); Sample B corresponds to the solution of 59% BPA removed (initial conc. 100 mg L<sup>-1</sup>).

## References

1. Y. Y. Ahn, E. T. Yun, J. W. Seo, C. Lee, S. H. Kim, J. H. Kim and J. Lee, Activation of Peroxymonosulfate by Surface-Loaded Noble Metal Nanoparticles for Oxidative Degradation of Organic Compounds, *Environ. Sci. Technol.*, 2016, **50**, 10187-10197.
2. B.-T. Zhang, Y. Zhang, Y. Teng and M. Fan, Sulfate Radical and Its Application in Decontamination Technologies, *Crit. Rev. Env. Sci. Tec.*, 2014, **45**, 1756-1800.
3. G. P. Anipsitakis and D. D. Dionysiou, Degradation of Organic Contaminants in Water with Sulfate Radicals Generated by the Conjunction of Peroxymonosulfate with Cobalt, *Environ. Sci. Technol.*, 2003, **37**, 4790-4797.
4. F. Ghanbari and M. Moradi, Application of peroxymonosulfate and its activation methods for degradation of environmental organic pollutants: Review, *Chem. Eng. J.*, 2017, **310**, Part 1, 41-62.
5. Y.-H. Huang, Y.-F. Huang, C.-i. Huang and C.-Y. Chen, Efficient decolorization of azo dye Reactive Black B involving aromatic fragment degradation in buffered Co<sup>2+</sup>/PMS oxidative processes with a ppb level dosage of Co<sup>2+</sup>-catalyst, *J. Hazard. Mater.*, 2009, **170**, 1110-1118.
6. Y. Wang, D. Cao and X. Zhao, Heterogeneous degradation of refractory pollutants by peroxymonosulfate activated by CoOx-doped ordered mesoporous carbon, *Chem. Eng. J.*, 2017, **328**, 1112-1121.
7. L. Lian, B. Yao, S. Hou, J. Fang, S. Yan and W. Song, Kinetic Study of Hydroxyl and Sulfate Radical-Mediated Oxidation of Pharmaceuticals in Wastewater Effluents, *Environ. Sci. Technol.*, 2017, **51**,

2954-2962.

8. Y. Liu, X. He, Y. Fu and D. D. Dionysiou, Kinetics and mechanism investigation on the destruction of oxytetracycline by UV-254nm activation of persulfate, *J. Hazard. Mater.*, 2016, **305**, 229-239.
9. M. Sanchez-Polo, M. M. Abdel daïem, R. Ocampo-Perez, J. Rivera-Utrilla and A. J. Mota, Comparative study of the photodegradation of bisphenol A by HO(\*), SO<sub>4</sub>(\*-) and CO<sub>3</sub>(\*-)/HCO<sub>3</sub> radicals in aqueous phase, *Sci. Total Environ.*, 2013, **463-464**, 423-431.
10. X. He, M. Pelaez, J. A. Westrick, K. E. O'Shea, A. Hiskia, T. Triantis, T. Kaloudis, M. I. Stefan, A. A. de la Cruz and D. D. Dionysiou, Efficient removal of microcystin-LR by UV-C/H<sub>2</sub>O<sub>2</sub> in synthetic and natural water samples, *Water Res.*, 2012, **46**, 1501-1510.
11. J. Criquet and N. K. Leitner, Degradation of acetic acid with sulfate radical generated by persulfate ions photolysis, *Chemosphere*, 2009, **77**, 194-200.
12. C. Tan, N. Gao, Y. Deng, N. An and J. Deng, Heat-activated persulfate oxidation of diuron in water, *Chem. Eng. J.*, 2012, **203**, 294-300.
13. J. Sharma, I. M. Mishra, D. D. Dionysiou and V. Kumar, Oxidative removal of Bisphenol A by UV-C/peroxymonosulfate (PMS): Kinetics, influence of co-existing chemicals and degradation pathway, *Chem. Eng. J.*, 2015, **276**, 193-204.
14. Z. Wang, Y. Du, Y. Liu, B. Zou, J. Xiao and J. Ma, Degradation of organic pollutants by NiFe<sub>2</sub>O<sub>4</sub>/peroxymonosulfate: efficiency, influential factors and catalytic mechanism, *RSC Adv.*, 2016, **6**, 11040-11048.
15. Y. Xu, J. Ai and H. Zhang, The mechanism of degradation of bisphenol A using the magnetically separable CuFe<sub>2</sub>O<sub>4</sub>/peroxymonosulfate heterogeneous oxidation process, *J. Hazard. Mater.*, 2016, **309**, 87-96.
16. G. X. Huang, C. Y. Wang, C. W. Yang, P. C. Guo and H. Q. Yu, Degradation of Bisphenol A by Peroxymonosulfate Catalytically Activated with Mn<sub>1.8</sub>Fe<sub>1.2</sub>O<sub>4</sub> Nanospheres: Synergism between Mn and Fe, *Environ. Sci. Technol.*, 2017, **51**, 12611-12618.
17. W. Li, P.-x. Wu, Y. Zhu, Z.-j. Huang, Y.-h. Lu, Y.-w. Li, Z. Dang and N.-w. Zhu, Catalytic degradation of bisphenol A by CoMnAl mixed metal oxides catalyzed peroxymonosulfate: Performance and mechanism, *Chem. Eng. J.*, 2015, **279**, 93-102.
18. K.-Y. A. Lin and Z.-Y. Zhang, Degradation of Bisphenol A using peroxymonosulfate activated by one-step prepared sulfur-doped carbon nitride as a metal-free heterogeneous catalyst, *Chem. Eng. J.*, 2017, **313**, 1320-1327.
19. Y. Wang, X. Zhao, D. Cao, Y. Wang and Y. Zhu, Peroxymonosulfate enhanced visible light photocatalytic degradation bisphenol A by single-atom dispersed Ag mesoporous g-C<sub>3</sub>N<sub>4</sub> hybrid, *Appl. Catal. B- Environ.*, 2017, **211**, 79-88.
